# Supplementary material for: Genome Size of Life Forms of Araceae—A New Piece in the C-Value Puzzle
Source: MDPI journal article supplement (doi:10.3390/plants11030334), 2022-01-27
Supplement: s1 [file s1]

Supplement for the Article

# Genome Size of Life Forms of *Araceae*—A New Piece in the C-Value Puzzle

Domen Kocjan <sup>1,†</sup>, Jasna Dolenc Koce <sup>2,†,\*</sup>, Florian Etl <sup>3</sup>, Marina Dermastia <sup>4</sup>

**Table S1.** 2C-values and life forms of aroid species used in the present analysis, taken from the Royal Botanic Gardens Kew database [14]. When two different authors measured the same species, both 2C values are included, resulting in duplicate values for some species.

| Genus                 | Species                                                  | Life form            | 2C [pg DNA] |
|-----------------------|----------------------------------------------------------|----------------------|-------------|
| <i>Alocasia</i>       | <i>A. cucullata</i>                                      | Terrestrial          | 16.74       |
|                       | <i>A. longiloba</i>                                      | Terrestrial          | 18.70       |
|                       | <i>A. reginula</i>                                       | Terrestrial          | 9.90        |
|                       | <i>A. sanderiana</i>                                     | Terrestrial          | 10.10       |
|                       | <i>A. sp.</i>                                            | Terrestrial          | 20.30       |
|                       | <i>A. zebrina</i> var. <i>tigrina</i> cv. <i>Superba</i> | Terrestrial          | 11.20       |
| <i>Amorphophallus</i> | <i>A. abyssinicus</i>                                    | Terrestrial          | 21.50       |
|                       | <i>A. bulbifer</i>                                       | Terrestrial          | 18.60       |
|                       | <i>A. commutatus</i>                                     | Terrestrial          | 23.50       |
|                       | <i>A. gallaensis</i>                                     | Terrestrial          | 23.50       |
|                       | <i>A. goetzei</i>                                        | Terrestrial          | 22.60       |
|                       | <i>A. hildebrandtii</i>                                  | Terrestrial          | 25.60       |
|                       | <i>A. johnsonii</i>                                      | Terrestrial          | 31.70       |
|                       | <i>A. konjac</i>                                         | Terrestrial          | 12.95       |
|                       | <i>A. krausei</i>                                        | Terrestrial          | 12.30       |
|                       | <i>A. lambii</i>                                         | Terrestrial          | 15.30       |
|                       | <i>A. lewallei</i>                                       | Terrestrial          | 27.80       |
|                       | <i>A. oncophyllus</i>                                    | Terrestrial          | 19.40       |
|                       | <i>A. paeoniifolius</i>                                  | Terrestrial          | 8.40        |
| <i>Anthurium</i>      | <i>A. prainii</i>                                        | Terrestrial          | 7.50        |
|                       | <i>A. amnicola</i>                                       | Aquatic (rheophyte)  | 10.36       |
|                       | <i>A. andraeanum</i>                                     | Facultative epiphyte | 9.59        |
|                       | <i>A. antioquiense</i>                                   | Aquatic (rheophyte)  | 9.83        |
|                       | <i>A. armenense</i>                                      | Obligatory epiphyte  | 12.01       |
|                       | <i>A. bakeri</i>                                         | Obligatory epiphyte  | 9.28        |
|                       | <i>A. cerrocampaense</i>                                 | Facultative epiphyte | 11.44       |
|                       | <i>A. clavigerum</i>                                     | Obligatory epiphyte  | 14.27       |
|                       | <i>A. clidemioides</i>                                   | Obligatory epiphyte  | 9.17        |
|                       | <i>A. coriaceum</i>                                      | Facultative epiphyte | 14.32       |

|                 |                                                         |                      |       |
|-----------------|---------------------------------------------------------|----------------------|-------|
|                 | <i>A. esmeraldense</i>                                  | Facultative epiphyte | 8.79  |
|                 | <i>A. flexile</i> subsp. <i>muelleri</i>                | Obligatory epiphyte  | 9.46  |
|                 | <i>A. formosum</i>                                      | Facultative epiphyte | 8.77  |
|                 | <i>A. fragrantissimum</i>                               | Obligatory epiphyte  | 6.21  |
|                 | <i>A. gracile</i>                                       | Obligatory epiphyte  | 12.38 |
|                 | <i>A. grande</i>                                        | Facultative epiphyte | 27.05 |
|                 | <i>A. gymnopus</i>                                      | Hemiepiphyte         | 11.21 |
|                 | <i>A. hoffmanni</i>                                     | Facultative epiphyte | 9.72  |
|                 | <i>A. hookeri</i>                                       | Facultative epiphyte | 8.07  |
|                 | <i>A. kamemotoanum</i>                                  | Facultative epiphyte | 9.47  |
|                 | <i>A. lentii</i>                                        | Facultative epiphyte | 13.96 |
|                 | <i>A. leuconeurum</i>                                   | Terrestrial          | 14.35 |
|                 | <i>A. lucens</i>                                        | Facultative epiphyte | 13.04 |
|                 | <i>A. microspadix</i>                                   | Facultative epiphyte | 12.25 |
|                 | <i>A. nymphaeifolium</i>                                | Facultative epiphyte | 9.45  |
|                 | <i>A. obtusum</i>                                       | Obligatory epiphyte  | 5.11  |
|                 | <i>A. ochranthum</i>                                    | Terrestrial          | 10.75 |
|                 | <i>A. pittieri</i>                                      | Obligatory epiphyte  | 5.61  |
|                 | <i>A. radicans</i>                                      | Terrestrial          | 14.36 |
|                 | <i>A. ravenii</i>                                       | Obligatory epiphyte  | 10.43 |
|                 | <i>A. roseospadix</i>                                   | Facultative epiphyte | 20.83 |
|                 | <i>A. scandens</i> subsp. <i>pusillum</i>               | Obligatory epiphyte  | 5.12  |
|                 | <i>A. scandens</i> subsp. <i>scandens</i>               | Obligatory epiphyte  | 9.64  |
|                 | <i>A. schlechtendalii</i> subsp. <i>schlechtendalii</i> | Obligatory epiphyte  | 12.55 |
|                 | <i>A. solitarium</i>                                    | Obligatory epiphyte  | 15.36 |
|                 | <i>A. warocqueanum</i>                                  | Obligatory epiphyte  | 8.86  |
|                 | <i>A. watermaliense</i>                                 | Facultative epiphyte | 8.52  |
|                 | <i>A. wendlingeri</i>                                   | Obligatory epiphyte  | 7.45  |
| <i>Anubias</i>  | <i>A. barteri</i> var. <i>nana</i>                      | Aquatic (rheophyte)  | 4.10  |
| <i>Arisaema</i> | <i>A. ciliatum</i>                                      | Terrestrial          | 9.78  |
|                 | <i>A. dracontium</i>                                    | Terrestrial          | 6.90  |
|                 | <i>A. flavum</i>                                        | Terrestrial          | 10.12 |
|                 | <i>A. triphyllum</i>                                    | Terrestrial          | 18.40 |
| <i>Arisarum</i> | <i>A. proboscidium</i>                                  | Terrestrial          | 17.90 |
|                 | <i>A. simorrhinum</i>                                   | Terrestrial          | 29.89 |
|                 | <i>A. vulgare</i>                                       | Terrestrial          | 29.12 |
| <i>Arum</i>     | <i>A. concinatum</i>                                    | Terrestrial          | 23.92 |
|                 | <i>A. cylindraceum</i>                                  | Terrestrial          | 9.05  |
|                 | <i>A. dioscoridis</i>                                   | Terrestrial          | 21.17 |
|                 | <i>A. hygrophilum</i>                                   | Terrestrial          | 20.86 |
|                 | <i>A. italicum</i>                                      | Terrestrial          | 25.27 |
|                 | <i>A. maculatum</i>                                     | Terrestrial          | 21.80 |
|                 | <i>A. orientale</i>                                     | Terrestrial          | 8.92  |

|                      |                                        |                      |       |
|----------------------|----------------------------------------|----------------------|-------|
| <i>Biarum</i>        | <i>B. olivieri</i>                     | Terrestrial          | 6.82  |
|                      | <i>B. tenuifolium</i>                  | Terrestrial          | 6.20  |
| <i>Caladium</i>      | <i>C. bicolor</i> var. red polka large | Terrestrial          | 20.26 |
|                      | <i>C. bicolor</i> var. red polka       | Terrestrial          | 11.04 |
|                      | <i>C. praetermissum</i>                | Terrestrial          | 7.51  |
| <i>Calla</i>         | <i>C. palustris</i>                    | Aquatic (helophyte)  | 2.16  |
| <i>Colocasia</i>     | <i>C. esculenta</i>                    | Terrestrial          | 6.60  |
|                      | <i>C. esculenta</i>                    | Terrestrial          | 8.10  |
| <i>Cryptocoryne</i>  | <i>C. crispatula</i>                   | Aquatic              | 1.78  |
|                      | <i>C. lingua</i>                       | Aquatic              | 1.80  |
|                      | <i>C. nevilli</i>                      | Aquatic              | 1.90  |
| <i>Dieffenbachia</i> | <i>D. seguine</i>                      | Terrestrial          | 24.66 |
| <i>Dracunculus</i>   | <i>D. canariensis</i>                  | Terrestrial          | 7.78  |
|                      | <i>D. vulgaris</i>                     | Terrestrial          | 13.70 |
| <i>Epipremnum</i>    | <i>E. aureum</i>                       | Nomadic vine         | 8.08  |
|                      | <i>E. aureum</i>                       | Nomadic vine         | 9.40  |
| <i>Homalomena</i>    | <i>rubescens</i>                       | Terrestrial          | 18.28 |
| <i>Lemna</i>         | <i>L. aequinoctialis</i>               | Aquatic              | 0.86  |
|                      | <i>L. gibba</i>                        | Aquatic              | 1.00  |
|                      | <i>L. japonica</i>                     | Aquatic              | 0.88  |
|                      | <i>L. minor</i>                        | Aquatic              | 2.91  |
|                      | <i>L. minor</i>                        | Aquatic              | 1.13  |
|                      | <i>L. obscura</i>                      | Aquatic              | 1.00  |
|                      | <i>L. trisulca</i>                     | Aquatic              | 0.92  |
|                      | <i>L. valdiviana</i>                   | Aquatic              | 0.66  |
| <i>Monstera</i>      | <i>M. deliciosa</i>                    | Nomadic vine         | 8.41  |
|                      | <i>M. obliqua</i>                      | Nomadic vine         | 18.01 |
| <i>Orontium</i>      | <i>O. aquaticum</i>                    | Aquatic (helophyte)  | 30.00 |
| <i>Philodendron</i>  | <i>P. erubescens</i>                   | Terrestrial          | 10.56 |
|                      | <i>P. melanochrysum</i>                | Nomadic vine         | 2.40  |
|                      | <i>P. pinnaatifidum</i>                | Terrestrial          | 4.88  |
|                      | <i>P. squamiferum</i>                  | Nomadic vine         | 9.30  |
| <i>Pinellia</i>      | <i>P. pedatisecta</i>                  | Terrestrial          | 2.44  |
|                      | <i>P. pedatisecta</i>                  | Terrestrial          | 2.79  |
|                      | <i>P. tripartita</i>                   | Terrestrial          | 7.05  |
| <i>Pistia</i>        | <i>P. stratiotes</i>                   | Aquatic              | 0.70  |
| <i>Remusatia</i>     | <i>R. vivipara</i>                     | Facultative epiphyte | 4.26  |
| <i>Rhaphidophora</i> | <i>S. montana</i>                      | Nomadic vine         | 20.06 |
|                      | <i>S. peepla</i>                       | Nomadic vine         | 18.34 |
| <i>Scindapsus</i>    | <i>S. pictus</i>                       | Nomadic vine         | 23.51 |
| <i>Spathicarpa</i>   | <i>S. hastifolia</i>                   | Terrestrial          | 18.92 |
| <i>Spathiphyllum</i> | <i>S. sp. cv. »Cupido«</i>             | Terrestrial          | 14.10 |

|                       |                          |              |       |
|-----------------------|--------------------------|--------------|-------|
|                       | S. sp. cv. »Macho«       | Terrestrial  | 20.10 |
|                       | S. sp. cv. »Mauna Loa«   | Terrestrial  | 7.10  |
| <i>Spirodela</i>      | <i>S. polyrhiza</i>      | Aquatic      | 0.60  |
|                       | <i>S. punctata</i>       | Aquatic      | 0.74  |
|                       | <i>S. punctata</i>       | Aquatic      | 0.82  |
| <i>Symplocarpus</i>   | <i>S. foetidus</i>       | Terrestrial  | 4.80  |
| <i>Syngonium</i>      | <i>S. angustatum</i>     | Nomadic vine | 9.45  |
|                       | <i>S. podophyllum</i>    | Nomadic vine | 9.71  |
| <i>Thaumatococcus</i> | <i>T. bipinnatifidum</i> | Nomadic vine | 9.99  |
| <i>Typhonium</i>      | <i>T. flagelliforme</i>  | Terrestrial  | 10.34 |
|                       | <i>T. trilobatum</i>     | Terrestrial  | 13.17 |
| <i>Wolffia</i>        | <i>W. angusta</i>        | Aquatic      | 3.40  |
|                       | <i>W. arrhiza</i>        | Aquatic      | 3.27  |
|                       | <i>W. australiana</i>    | Aquatic      | 0.76  |
|                       | <i>W. borealis</i>       | Aquatic      | 1.82  |
|                       | <i>W. brasiliensis</i>   | Aquatic      | 1.58  |
|                       | <i>W. columbiana</i>     | Aquatic      | 1.78  |
|                       | <i>W. cylindracea</i>    | Aquatic      | 2.20  |
|                       | <i>W. elongata</i>       | Aquatic      | 1.74  |
|                       | <i>W. globosa</i>        | Aquatic      | 2.64  |
|                       | <i>W. microscopica</i>   | Aquatic      | 3.40  |
|                       | <i>W. neglecta</i>       | Aquatic      | 2.40  |
| <i>Wolffiella</i>     | <i>W. gladiata</i>       | Aquatic      | 1.28  |
|                       | <i>W. hyalina</i>        | Aquatic      | 1.98  |
|                       | <i>W. lingulata</i>      | Aquatic      | 1.34  |
|                       | <i>W. oblonga</i>        | Aquatic      | 1.52  |
| <i>Xanthosoma</i>     | <i>X. sagittifolium</i>  | Terrestrial  | 17.57 |
|                       | <i>X. sagittifolium</i>  | Terrestrial  | 4.60  |
| <i>Zamioculcas</i>    | <i>Z. zamiifolia</i>     | Terrestrial  | 48.10 |
| <i>Zantedeschia</i>   | <i>Z. aethiopica</i>     | Terrestrial  | 4.60  |
|                       | <i>Z. albomaculata</i>   | Terrestrial  | 4.60  |

**Table S2.** List of aroid species with harmonized names based on current taxonomy [18,31,32].

| Royal Botanic Gardens Kew database        | Synonym after current taxonomy                |
|-------------------------------------------|-----------------------------------------------|
| <i>Alocasia hilobeauty</i>                | <i>Caladium praetermissum</i>                 |
| <i>Alocasia lowii</i> var. <i>grandis</i> | <i>Alocasia longiloba</i> var. <i>grandis</i> |
| <i>Alocasia x amazonica</i>               | <i>Alocasia sanderiana</i>                    |
| <i>Amorphophallus dubius</i>              | <i>Amorphophallus paeoniifolius</i>           |
| <i>Amorphophallus laxiflorus</i>          | <i>Amorphophallus gallaensis</i>              |
| <i>Amorphophallus rivieri</i>             | <i>Amorphophallus konjac</i>                  |
| <i>Amorphophallus sutepensis</i>          | <i>Amorphophallus krausei</i>                 |
| <i>Arum elongatum</i>                     | <i>Arum orientale</i>                         |
| <i>Colocasia antiquorum</i>               | <i>Colocasia esculenta</i>                    |
| <i>Dieffenbachia picta</i>                | <i>Dieffenbachia seguine</i>                  |
| <i>Landoltia punctata</i>                 | <i>Spirodela punctata</i>                     |
| <i>Philodendron andreanum</i>             | <i>Philodendron melanochrysum</i>             |
| <i>Philodendron selloum</i>               | <i>Thaumatococcus bipinnatifidum</i>          |
| <i>Scindapsus aureus</i>                  | <i>Epipremnum aureum</i>                      |
| <i>Spathicarpa sagittifolia</i>           | <i>Spathicarpa hastifolia</i>                 |
| <i>Syngonium albo-lineatum</i>            | <i>Syngonium angustatum</i>                   |
| <i>Typhonium cuspidatum</i>               | <i>Typhonium flagelliforme</i>                |
| <i>Xanthosoma violaceum</i>               | <i>Xanthosoma sagittifolium</i>               |
